# Supplementary material
Source: PubMed Central journal article supplement (PMC7186164)
Supplement: supp_RA120.012588_158145_1_supp_490014_q6xm0d.pdf [file supp_RA120.012588_158145_1_supp_490014_q6xm0d.pdf]

**Table S1: Primers used to generate SC(1-246) double- and triple-mutant constructs.**

| Name                  | Primers                                                                     |
|-----------------------|-----------------------------------------------------------------------------|
| Double Mutant Primers |                                                                             |
| SC(1-246) 5'          | 5' GAGTTATGATAGTAGTAAACATCACTGAAAAAATCACAGTGAAGGTTTTGAGGC 3'                |
| SC(1-246) 3'          | 5' GCCTCAAACCTTCACTGTGATTTTTTCAGTGATGTTTACTACTATCATAACTC 3'                 |
| Degenerate Forward    | 5' GAGAACCTGTATTTTCAGNNGNNGACAAAGGATTATAGTAAAG 3'                           |
| Degenerate Reverse    | 5' CTTTACTATAATCCTTTGTGTCNNCNCNCTGAAAATACAGGTTCTC 3'                        |
| Degenerate Forward    | 5' GAGAACCTGTATTTTCAGNNCNNCACAAAGGATTATAGTAAAG 3'                           |
| Degenerate Reverse    | 5' CTTTACTATAATCCTTTGTGNNGNNCNCTGAAAATACAGGTTCTC 3'                         |
| Degenerate Forward    | 5' CTTTACTATAATCCTTTGTGNNGNNCNCTGAAAATACAGGTTCTC 3'                         |
| Degenerate Reverse    | 5' GAGAACCTGTATTTTCAGNNCNNCACAAAGGATTATAGTAAAG 3'                           |
| SC(1-246)LV Forward   | 5' AACCTGTATTTTCAGCTAGTAACAAAGGATTAT 3'                                     |
| SC(1-246)TV Forward   | 5' AACCTGTATTTTCAGACAGTAACAAAGGATTAT 3'                                     |
| SC(1-246)VV Forward   | 5' AACCTGTATTTTCAGGTAGTAACAAAGGATTAT 3'                                     |
| SC(1-246)IL Forward   | 5' AACCTGTATTTTCAGATACTAACAAAGGATTAT 3'                                     |
| SC(1-246)IT Forward   | 5' AACCTGTATTTTCAGATAACAACAAAGGATTAT 3'                                     |
| SC(1-246)IA Forward   | 5' AACCTGTATTTTCAGATAGCAACAAAGGATTAT 3'                                     |
| SC(1-246)TP Forward   | 5' GAGAACCTGTATTTTCAGACACCAACAAAGGATTATAGTAAAGAA 3'                         |
| SC(1-246) Reverse 1   | 5' CTGAAAATACAGGTTCTCGTTCCATGGCAC 3'                                        |
| SC(1-246) Reverse 2   | 5' ATTCACTCTTGATTCTTTACTATAATCCTTTGT 3'                                     |
| SC(1-246)TA Forward   | 5' CCATGGAACGAGAACCTGTATTTTCAGACAGCAACAAAGGATTATAGTAAAGAATCAAGA 3'          |
| SC(1-246)IW Forward   | 5' CCATGGAACGAGAACCTGTATTTTCAGATATGGACAAAGGATTATAGTAAAGAATCAAGA 3'          |
| SC(1-246) Reverse     | 5' CTGAAAATACAGGTTCTCGTTCCATGGCAC 3'                                        |
| SC(1-246)LQ Forward   | 5'GTGCCATGGACCGAGAACCTGTATTTTCAGCTGCAGACAAAGGATTATAGTAAAGAATCAAGAGT<br>G 3' |
| SC(1-246)LQ Reverse   | 5' CACTCTTGATTCTTTACTATAATCCTTTGTCTGCAGCTGAAAATACAGGTTCTCGGTCCATGGCAC<br>3' |

|                       |                                                                      |
|-----------------------|----------------------------------------------------------------------|
| SC(1-246)VG Forward   | 5' GCCATGGACCGAGAACCTGTATTTTCAGGTCGGCACAAAGGATTATAGTAAAGAATCAAGAG 3' |
| SC(1-246)VG Reverse   | 5' CTCTTGATTCTTTACTATAATCCTTTGTGCCGACCTGAAAATACAGGTTCTCGGTCCATGGC 3' |
| Triple Mutant Primers |                                                                      |
| Degenerate Forward    | 5' TGGAACGAGAACCTGTATTTTCAGNNCNNGNNTAAGGATTATAGTAAAGAATCAAGA 3'      |
| Degenerate Forward    | 5' TGGAACGAGAACCTGTATTTTCAGNNCNNTNNGAAGGATTATAGTAAAGAATCAAGA 3'      |
| Degenerate Forward    | 5' TGGAACGAGAACCTGTATTTTCAGNNTNNGNNAAGGATTATAGTAAAGAATCAAGA 3'       |
| Degenerate Forward    | 5' TGGAACGAGAACCTGTATTTTCAGNNTNNCNNGAAGGATTATAGTAAAGAATCAAGA 3'      |
| Degenerate Forward    | 5' TGGAACGAGAACCTGTATTTTCAGNNGNNCNNAAGGATTATAGTAAAGAATCAAGA 3'       |
| Degenerate Forward    | 5' TGGAACGAGAACCTGTATTTTCAGNNANNCNNGAAGGATTATAGTAAAGAATCAAGA 3'      |
| Degenerate Forward    | 5' TGGAACGAGAACCTGTATTTTCAGNNANNTNNGAAGGATTATAGTAAAGAATCAAGA 3'      |
| Degenerate Forward    | 5' TGGAACGAGAACCTGTATTTTCAGNNANNTNCAAGGATTATAGTAAAGAATCAAGA 3'       |
| Degenerate Forward    | 5' TGGAACGAGAACCTGTATTTTCAGNNTNNANCAAGGATTATAGTAAAGAATCAAGA 3'       |
| Degenerate Forward    | 5' TGGAACGAGAACCTGTATTTTCAGNNGNNGNNGAAGGATTATAGTAAAGAATCAAGA 3'      |
| Degenerate Forward    | 5' TGGAACGAGAACCTGTATTTTCAGNNTNNTNNTAAGGATTATAGTAAAGAATCAAGA 3'      |
| Degenerate Forward    | 5' TGGAACGAGAACCTGTATTTTCAGNNANNANNAAGGATTATAGTAAAGAATCAAGA 3'       |
| SC(1-246)RHW Forward  | 5' GAGAACCTGTATTTTCAGAGACATTGGAAGGATTATAGTAAAGAA 3'                  |
| SC(1-246)DDY Forward  | 5' GAGAACCTGTATTTTCAGGATGATTATAAGGATTATAGTAAAGAA 3'                  |
| SC(1-246) Reverse 1   | 5' CTGAAAATACAGGTTCTCGTTCCATGGCACCAG 3'                              |
| SC(1-246) Reverse 2   | 5' CTGAAAATACAGGTTCTCGTTCCATGGCACCAGACCAGAAGAATGATGATGATGATG 3'      |

**Table S2: Extinction coefficients and molecular masses used to calculate the concentration of the SC(1-246) mutants.** The extinction coefficient 0.936 mL mg<sup>-1</sup> cm<sup>-1</sup> determined for wild-type SC(1-246) was used for NH<sub>2</sub>-terminal double mutants except for I1W2, M1W2, W1E2, A1W2, and W1A2. Extinction coefficients for these mutants were calculated by the ExPasy tool, <https://web.expasy.org/protparam/>.

| <b>NH<sub>2</sub>-terminal Mutants</b>                     | <b>Extinction Coefficient<br/>E<sub>280,0.1%</sub> (mL mg<sup>-1</sup> cm<sup>-1</sup>)</b> | <b>Molecular Mass<br/>(M<sub>r</sub>)(Daltons)</b> |
|------------------------------------------------------------|---------------------------------------------------------------------------------------------|----------------------------------------------------|
| A1K2                                                       | 0.936                                                                                       | 29145                                              |
| A1S2                                                       | 0.936                                                                                       | 29091                                              |
| G1A2                                                       | 0.936                                                                                       | 29061                                              |
| G1G2                                                       | 0.936                                                                                       | 29047                                              |
| G1H2                                                       | 0.936                                                                                       | 29127                                              |
| G1P2                                                       | 0.936                                                                                       | 29087                                              |
| I1W2                                                       | 1.120                                                                                       | 29232                                              |
| K1A2                                                       | 0.936                                                                                       | 29312                                              |
| L1P2                                                       | 0.936                                                                                       | 29143                                              |
| L1T2                                                       | 0.936                                                                                       | 29147                                              |
| M1E2                                                       | 0.936                                                                                       | 29193                                              |
| M1K2                                                       | 0.936                                                                                       | 29139                                              |
| M1L2                                                       | 0.936                                                                                       | 29177                                              |
| M1W2                                                       | 1.250                                                                                       | 29250                                              |
| Q1K2                                                       | 0.936                                                                                       | 29189                                              |
| Q1L2                                                       | 0.936                                                                                       | 29121                                              |
| R1Q2                                                       | 0.936                                                                                       | 29217                                              |
| R1R2                                                       | 0.936                                                                                       | 29245                                              |
| S1K2                                                       | 0.936                                                                                       | 29148                                              |
| T1A2                                                       | 0.936                                                                                       | 29127                                              |
| V1G2                                                       | 0.936                                                                                       | 29089                                              |
| W1E2                                                       | 1.25                                                                                        | 29248                                              |
| A1W2, W1A2                                                 | 1.25                                                                                        | 29190                                              |
| A1T2, G1D2                                                 | 0.936                                                                                       | 29105                                              |
| E1T2, N1D2                                                 | 0.936                                                                                       | 29162                                              |
| L1Q2, L1K2                                                 | 0.936                                                                                       | 29174                                              |
| E1S2, I1A2, I1L2, I1T2,<br>L1V2, T1D2, T1P2, T1V2,<br>V1V2 | 0.936                                                                                       | 29149                                              |
| D1D2Y3                                                     | 1.02                                                                                        | 29225                                              |
| E1L2K3                                                     | 1.20                                                                                        | 29202                                              |
| E1S2W3                                                     | 1.27                                                                                        | 29239                                              |
| F1L2Q3                                                     | 1.11                                                                                        | 29226                                              |
| G1G2G3                                                     | 1.01                                                                                        | 29008                                              |
| I1I2V3                                                     | 1.23                                                                                        | 29157                                              |
| R1H2W3                                                     | 1.33                                                                                        | 29310                                              |

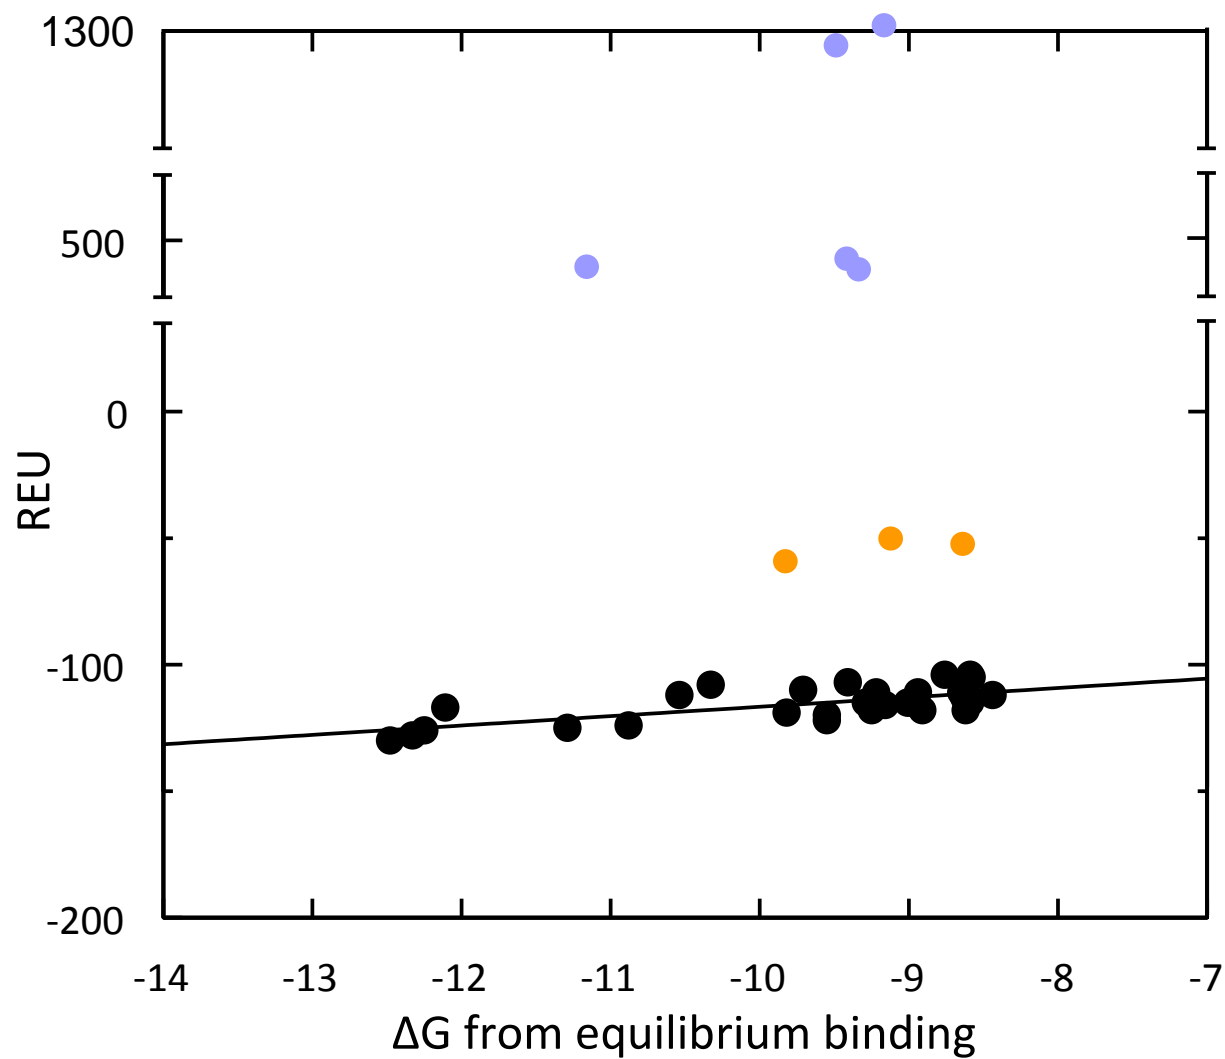

**Figure S1: Correlation between REU and  $\Delta G$  values calculated from equilibrium binding, expanded to include theoretical outliers with Trp (purple) or Pro (orange) in the NH<sub>2</sub>-termini.**
